# Supplementary material
Source: publisher site journal article supplement (https://www.spandidos-publications.com/3841/downloadSupplementary)
Supplement: Supplementary file 1 [file downloadSupplementary]

Figure S1. Representative mass spectra images of the identified proteins. ADIPOQ, adiponectin, C1Q and collagen domain containing; THBS4, thrombospondin 4; GPIBB, glycoprotein Ib platelet subunit  $\beta$ ; APOF, apolipoprotein F; PSG9, pregnancy specific  $\beta$ -1-glycoprotein 9; APCS, amyloid P component, serum.

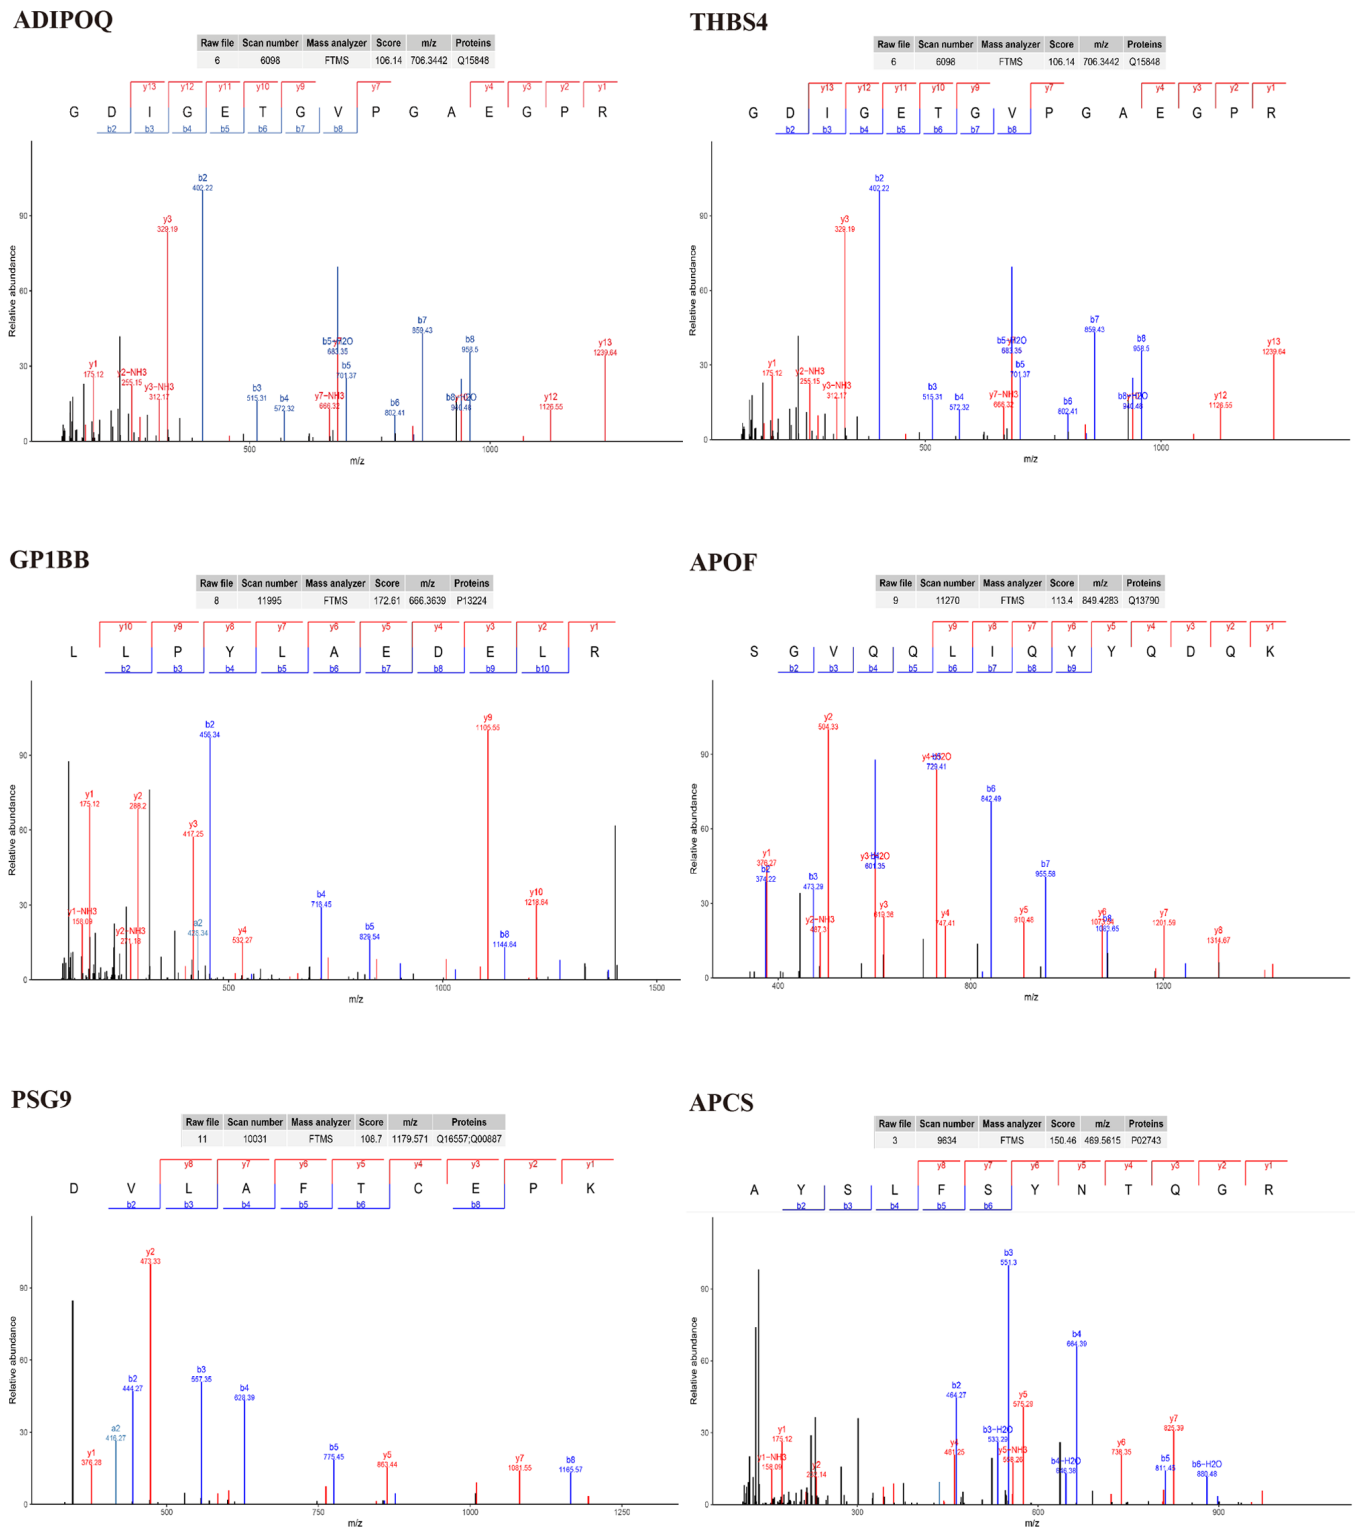

Figure S2. A heatmap was generated from the hierarchical clustering of the Gene Ontology analysis results, showing that umbilical cord serum proteins were enriched in cellular component terms that were related to cell junction, cell adhesion and extracellular matrix components. The differentially expressed proteins were categorized into four groups according to their fold change: Q1 (0-0.5), Q2 (0.5-0.67), Q3 (1.5-2) and Q4 (>2), with  $P < 0.05$  in all cases. The functional annotation following enrichment, together with the corresponding enrichment P-value, were first collected. The functional classifications that were enriched in at least one of the clusters (with  $P < 0.05$ ) were then screened. The filtered P-value data matrix was  $-\log_{10}$  transformed. The transformed data matrix was classified by Z transformation for each functional category. Lastly, the dataset obtained following Z transformation was analyzed using one-way hierarchical clustering.

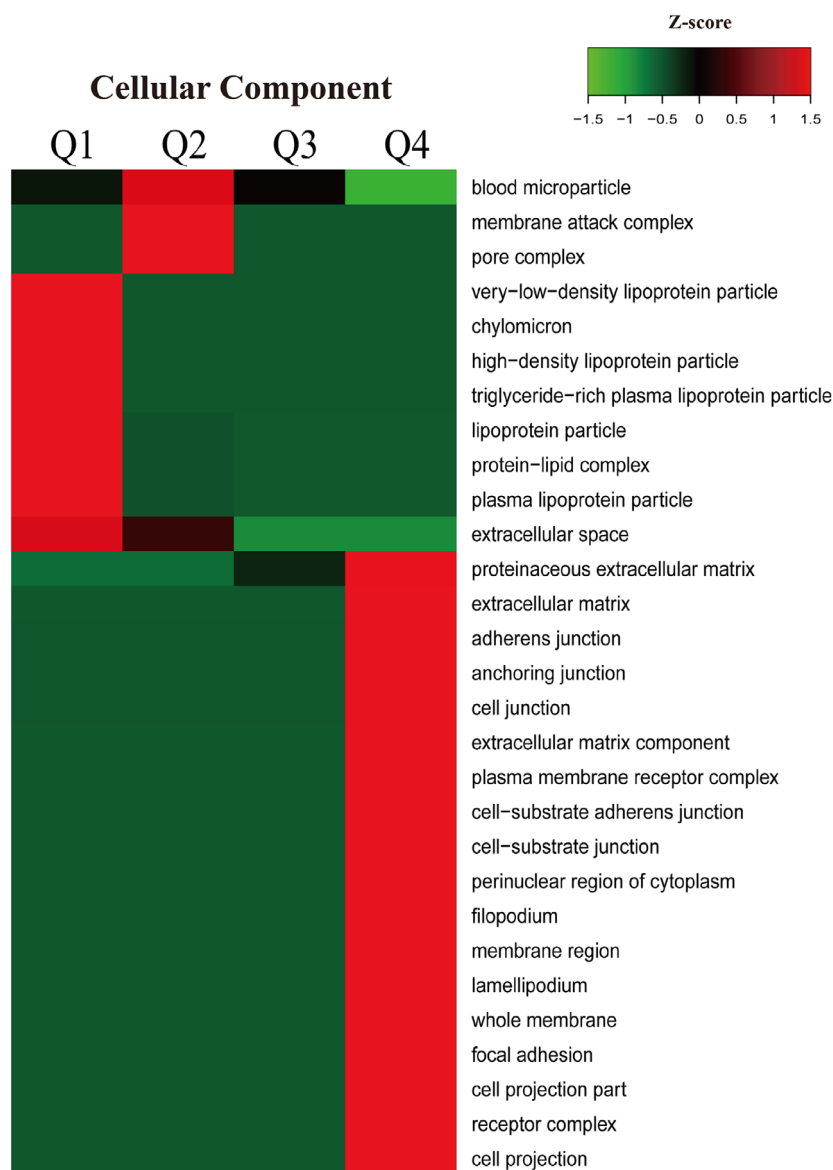

Figure S3. A heatmap was generated from hierarchical clustering of the Gene Ontology analysis results, showing that umbilical cord serum proteins were enriched in biological process terms that were related to gene regulation, as well as cell growth, differentiation, motility and adhesion. The differentially expressed proteins were categorized into four groups according to their fold change: Q1 (0-0.5), Q2 (0.5-0.67), Q3 (1.5-2) and Q4 (>2), with P<0.05 in all cases.

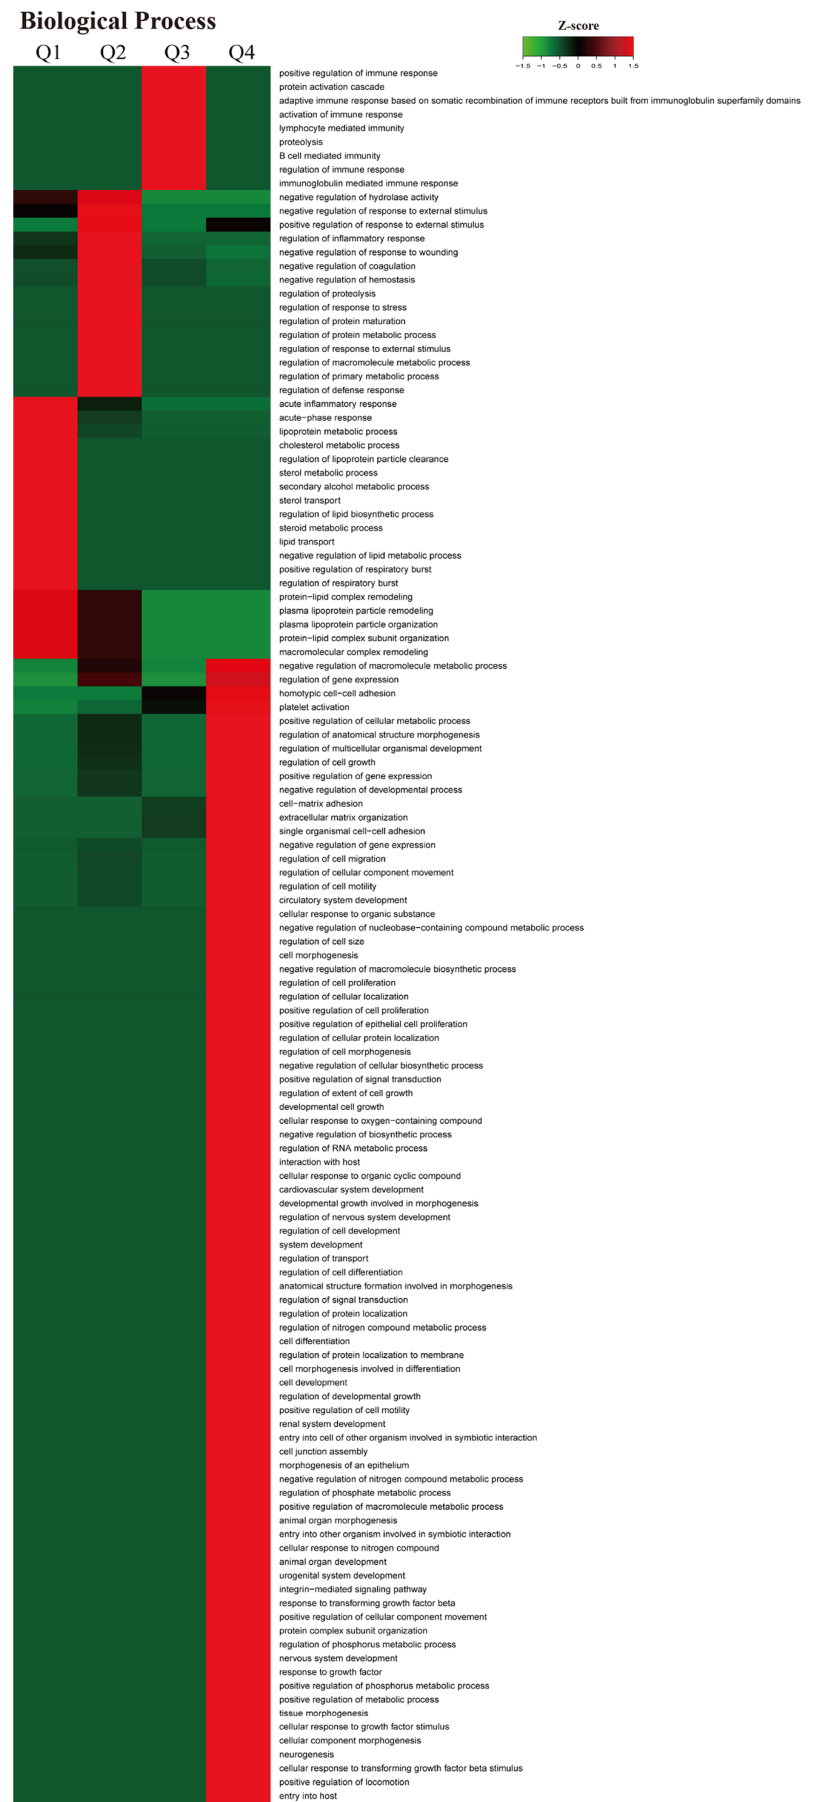

Figure S4. A heatmap was generated from hierarchical clustering of the Gene Ontology analysis results, showing that umbilical cord serum proteins were enriched in molecular function terms that were related to molecule binding, including integrin binding and enzyme binding. The differentially expressed proteins were categorized into four groups according to their fold change: Q1 (0-0.5), Q2 (0.5-0.67), Q3 (1.5-2) and Q4 (>2), with P<0.05 in all cases.

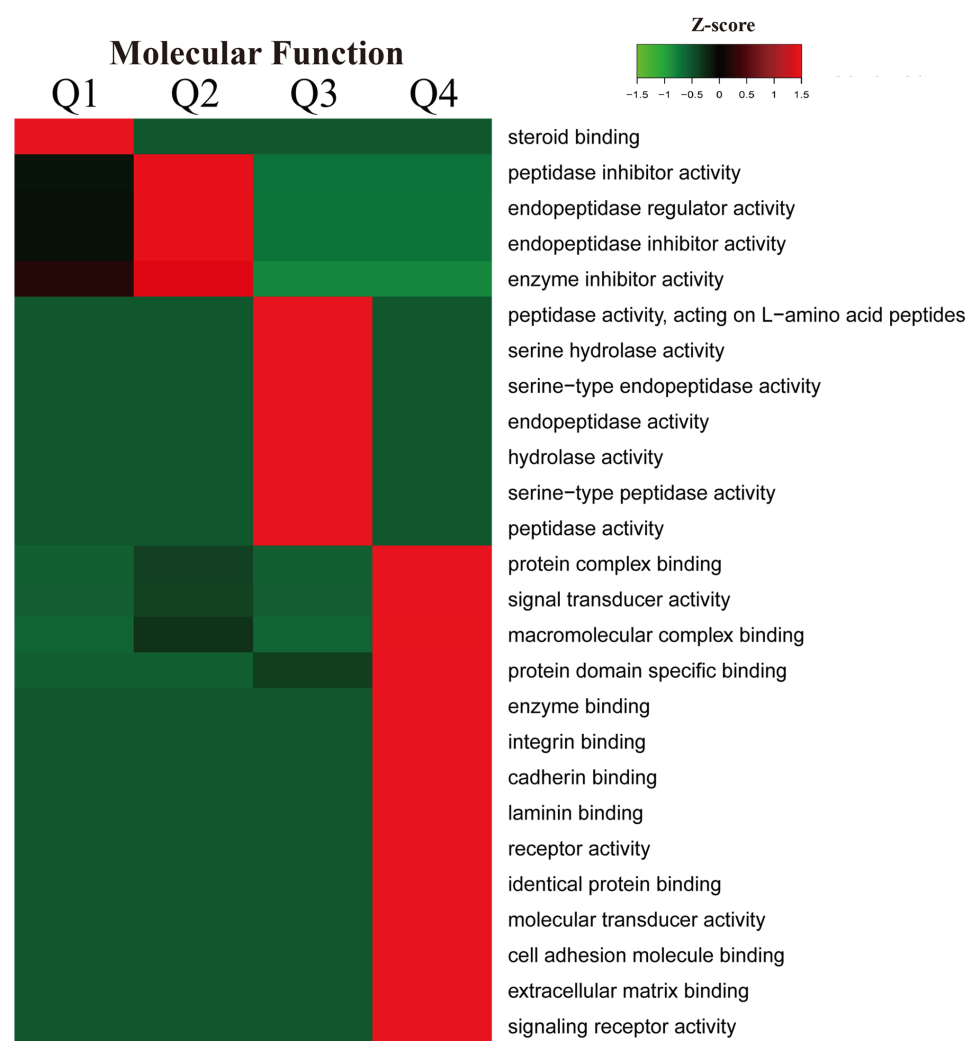

Figure S5. Flow cytometry was used to determine apoptotic cell death of MHCC97H cells treated with exosomes from the negative control, ME and UE groups. The data are presented as the mean  $\pm$  SEM. \* $P$ <0.05, \*\* $P$ <0.01, \*\*\* $P$ <0.001. ME, maternal serum exosome; UE, umbilical serum exosome; PI, propidium iodide. The different quadrants Q1, Q2, Q3 and Q4 represent necrotic cells, late apoptotic cells, early apoptotic cells and viable cells, respectively.

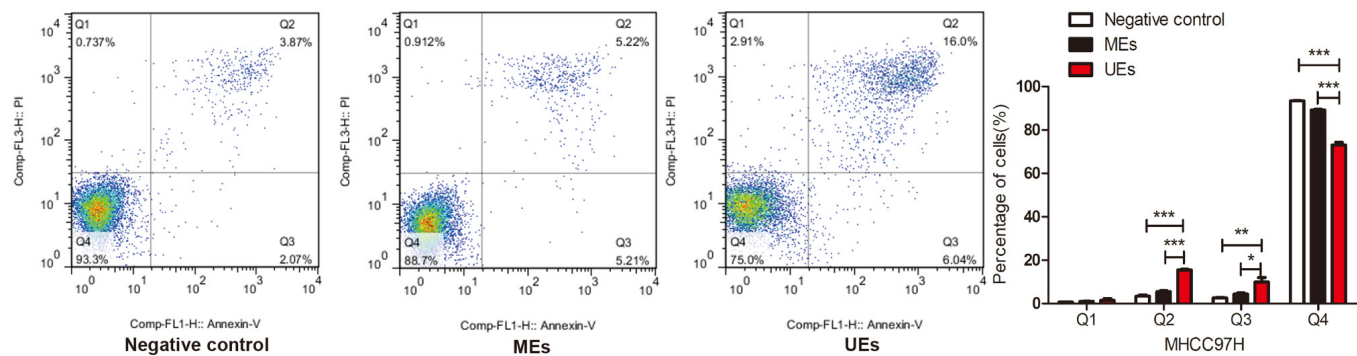

Table SI. Representative mass spectra of some differentially expressed proteins.

| Gene name | Protein description                      | UEs/MEs ratio | MW (kDa) | Score  |
|-----------|------------------------------------------|---------------|----------|--------|
| ADIPOQ    | Adiponectin                              | 5.724 Up      | 26.413   | 35.253 |
| THBS4     | Thrombospondin-4                         | 5.211 Up      | 105.87   | 156.01 |
| GP1BB     | Platelet glycoprotein Ib beta chain      | 5.067 Up      | 21.717   | 55.474 |
| COL1A1    | Collagen alpha-1(I) chain                | 4.956 Up      | 138.94   | 18.486 |
| THBS3     | Thrombospondin-3                         | 4.78 Up       | 104.2    | 40.532 |
| TNXB      | Tenascin-X                               | 4.373 Up      | 458.22   | 131.96 |
| PPIA      | Peptidyl-prolyl cis-trans isomerase A    | 4.283 Up      | 18.012   | 29.025 |
| PF4V1     | Platelet factor 4 variant                | 4.197 Up      | 11.553   | 13.468 |
| MSN       | Moesin                                   | 3.998 Up      | 67.819   | 24.523 |
| GP1BA     | Platelet glycoprotein Ib alpha chain     | 3.848 Up      | 71.539   | 25.828 |
| CRP       | C-reactive protein                       | 0.062 Down    | 25.038   | 47.518 |
| IGHA2     | Ig $\alpha$ -2 chain C region            | 0.086 Down    | 36.526   | 54.714 |
| PZP       | Pregnancy zone protein                   | 0.104 Down    | 163.86   | 228.85 |
| APOL1     | Apolipoprotein L1                        | 0.106 Down    | 43.974   | 81.534 |
| HP        | Haptoglobin                              | 0.108 Down    | 45.205   | 190.31 |
| IGHA1     | Ig alpha-1 chain C region                | 0.115 Down    | 37.654   | 227.22 |
| PSG4      | Pregnancy-specific beta-1-glycoprotein 4 | 0.116 Down    | 47.112   | 79.15  |
| APOF      | Apolipoprotein F                         | 0.117 Down    | 35.399   | 25.247 |
| PSG9      | Pregnancy-specific beta-1-glycoprotein 9 | 0.147 Down    | 48.272   | 26.244 |
| APCS      | Serum amyloid P-component                | 0.155 Down    | 25.387   | 88.277 |

ME, maternal serum exosome; UE, umbilical serum exosome; MW, molecular weight.
